# Supplementary material for: An effective coupling of nanostructured Si and gel polymer electrolytes for high-performance lithium-ion battery anodes
Source: Royal Society of Chemistry journal article supplement (doi:10.1039/c5ra24256h), 2016-01-01
Supplement: c5ra24256h1.pdf [file c5ra24256h1.pdf]

## Supplementary Information

### **An effective coupling of nanostructured Si and gel polymer electrolytes for high-performance lithium-ion battery anodes**

Taesoo Bok,<sup>a</sup> Sung-Ju Cho,<sup>a</sup> Sinho Choi, Keun-Ho Choi, Hyungmin Park, Sang-Young Lee\* and Soojin Park\*

Department of Energy Engineering, School of Energy and Chemical Engineering, Ulsan National Institute of Science and Technology (UNIST), UNIST-gil 50, Ulsan 689-798, Republic of Korea.

**Table S1.** Electrochemical performances of various Si anodes combined with liquid electrolytes (LE) and gel-polymer electrolytes (GPE).

|                              | 1 <sup>st</sup> Cycle<br>Coulombic Efficiency (%) |     | Cycle Rentention (%) |     | Volume Expansion (%) |     |
|------------------------------|---------------------------------------------------|-----|----------------------|-----|----------------------|-----|
|                              | LE                                                | GPE | LE                   | GPE | LE                   | GPE |
| <b>Mesoporous Silicon</b>    | 77                                                | 75  | 48                   | 76  | 131                  | 65  |
| <b>Macroporous Diatomite</b> | 86                                                | 87  | 51                   | 73  | 187                  | 134 |
| <b>Illite</b>                | 84                                                | 84  | 61                   | 64  | 195                  | 101 |

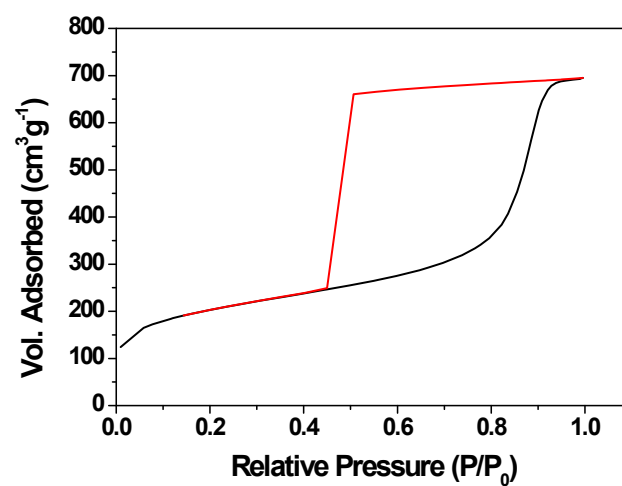

**Fig. S1** The surface area of synthesized silica foam after heat treatment showing 686.17m<sup>2</sup> g<sup>-1</sup>.

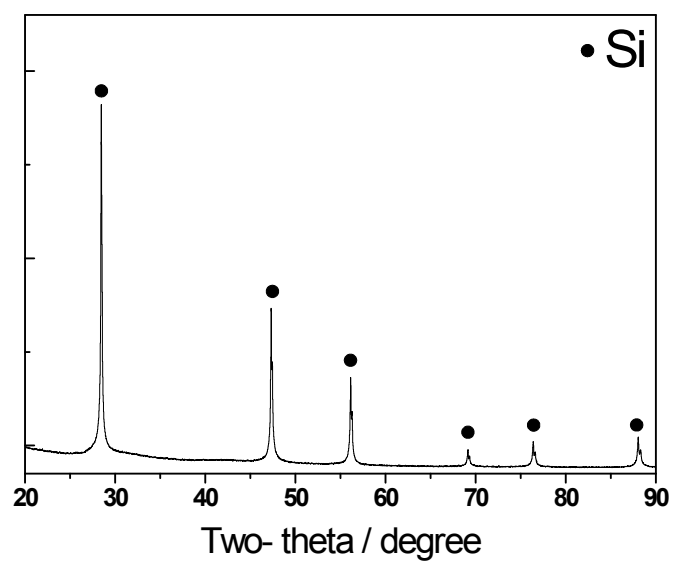

**Fig. S2** The XRD patterns of reduced diatomite by magnesiothermic reduction reaction indicating pure silicon peaks only. It means that only crystalline silicon remained and there is no compounds such as  $\text{Mg}_2\text{SiO}_4$  and  $\text{Mg}_x\text{Si}_y$  after MRR.
